# Supplementary material for: A relationship that makes life worth-living: levels of value orientation explain differences in meaning and life satisfaction
Source: PubMed Central journal article supplement (PMC8802095; doi:10.1016/j.heliyon.2022.e08802), 2022-01-24
Supplement: mmc1.pdf [file mmc1.pdf]

APPENDIX A

A comprehensive list of sources of meaning and value descriptions.

Table A1. Sources of meaning: Reviewed previous studies on sources of meaning, since 1980.

| Publication                   | Sources of meaning                                                                                                                                                                                                                                                                                                                                                                                                                                                                                                                                                                                                                                       | Sample                                |
|-------------------------------|----------------------------------------------------------------------------------------------------------------------------------------------------------------------------------------------------------------------------------------------------------------------------------------------------------------------------------------------------------------------------------------------------------------------------------------------------------------------------------------------------------------------------------------------------------------------------------------------------------------------------------------------------------|---------------------------------------|
| Bar-Tur et al. (2001)         | Family and Communal Values / Materialistic Concerns /Autonomy and independence / Interpersonal relationships / Communal activities /Attainment of tranquility/Self-development and leisure / Family relationships / Leisure activities with others / Being with animals / Good relationships with spouse                                                                                                                                                                                                                                                                                                                                                 | Young to old adults (Jews and Arabs)  |
| Baum & Stewart (1990)         | Work / Love and Marriage / Births of Children / Independent Pursuits / Accidents, Illnesses - Death / Separations-Divorces / Major Purchases                                                                                                                                                                                                                                                                                                                                                                                                                                                                                                             | Young and older adults                |
| Debats (1999)                 | Relationship / Family, Partner / Lover / Friends / Combinations (of relationships) / Lifework / Personal well-being (appreciation of life) / Health / Self-actualisation, (tangible and intangible goals / talents) / Service, Beliefs (religious / spiritual, social/ political) / Materiality / Future - hope                                                                                                                                                                                                                                                                                                                                          | Young adults                          |
| DeVogler & Ebersole (1980)    | Relationships / Service / Growth / Belief / Existential-Hedonistic / Obtaining / Expression / Understanding                                                                                                                                                                                                                                                                                                                                                                                                                                                                                                                                              | College students                      |
| DeVogler & Ebersole (1983)    | Relationships / Activities / Health / Obtaining / School / Appearance / Belief / Growth / Service / Pleasure / Miscellaneous                                                                                                                                                                                                                                                                                                                                                                                                                                                                                                                             | Adolescents                           |
| Ebersole & DeVogler (1981)    | Relationships / Belief / Health / Growth / Life work / Service / Understanding / Pleasure / Expression / Obtaining / Miscellaneous                                                                                                                                                                                                                                                                                                                                                                                                                                                                                                                       | Adults                                |
| Ebersole & Depaola (1987)     | Relationships / Service / Belief / Obtaining / Growth / Health / Life Work / Pleasure / Appearance /Activities / School / Miscellaneous                                                                                                                                                                                                                                                                                                                                                                                                                                                                                                                  | Adolescents                           |
| Fegg et al. (2008)            | Family / Work / Studying / Friends / Partner / Leisure time / Religiosity / Health / Animals / Nature / Finances / Well-being / Hedonism / Altruism / Home (garden)                                                                                                                                                                                                                                                                                                                                                                                                                                                                                      | University students                   |
| Lambert et al. (2010)         | Happiness / Friends / Family / Religious faith / Achievements / Self-acceptance / Personal growth / Self-worth / Justice-fairness / Personal goals / Intimacy / Helping others                                                                                                                                                                                                                                                                                                                                                                                                                                                                           | Undergraduate students                |
| Reker (1996)                  | Engaging in personal relationships with family and friends, Feeling financially secure, Preserving human values and ideals, Meeting basic everyday needs, Participation in leisure activities / Interest in human rights (humanistic concerns) / Being of service to others / Leaving a legacy for the next generation / Preserving culture and tradition / Taking part in creative activities / Experiencing personal growth / Participating in hedonistic activities / Interest in social causes / Being acknowledged for personal achievements / Acquiring material possessions in order to enjoy the good life / Taking part in religious activities | Older adults                          |
| Reker & Guppy (1988)          | Personal relationships / Altruism / Religious activities / Creative activities / Personal growth / Meeting basic needs / Pleasurable-leisure activities / Personal achievement / Legacy / Enduring values or ideals / Traditions and culture / Social-political causes                                                                                                                                                                                                                                                                                                                                                                                   | Adults                                |
| O'Connor & Chamberlain (1996) | Relationship with People / Creativity / Religious-Spiritual / Personal Development / Social-Political / Relationships with Nature                                                                                                                                                                                                                                                                                                                                                                                                                                                                                                                        | Mid-life adults                       |
| Schnell (2009)                | Self-transcendence (Vertical: Explicit religiosity / Spirituality - Horizontal: Social commitment / Unison with nature / Self-knowledge / health / generativity) / Self-actualization (Challenge / Individualism / Power / Development / Achievement / Freedom / Knowledge / Creativity) Order (Tradition / Practicality / Morality / Reason) / Well-being / Relatedness (Community / Fun / Love / Comfort / Care / Attentiveness / Harmony)                                                                                                                                                                                                             | Adolescents and older adults (German) |
| Steger et al. (2013)          | Hobby - Leisure / Relationships / Pets / Possessions / Everyday necessities / Religion / Education / Technology / Organization-Activities / Physical environment / Occupation - work / Nature / Values / Future aspirations / Self-love, Love / Trust / Heritage / Honesty / Family traditions / Memories                                                                                                                                                                                                                                                                                                                                                | Undergraduate students                |
| Unknown study                 | Supporting my children / Helping my mum / Love / Giving food to homeless people / Swimming / My career / Trust / My child growing up / Gardening / Walking / Going to church / My partner.                                                                                                                                                                                                                                                                                                                                                                                                                                                               | Convenient sample                     |

Note: List includes only studies that used unique sources of meaning

References

- Bar-Tur, L., Savaya, R., & Prager, E. (2001). Sources of meaning in life for young and old Israeli Jews and Arabs. *Journal of Aging Studies, 15* (3), 253-269.
- Baum, S. K., & Stewart Jr, R. B. (1990). Sources of meaning through the lifespan. *Psychological Reports, 67* (1), 3-14.
- Debats, D. L. (1999). Sources of meaning: An investigation of significant commitments in life. *Journal of Humanistic Psychology, 39* (4), 30-57.
- Devogler, K. L., & Ebersole, P. (1980). Categorization of college students' meaning of life. *Psychological Reports, 46* (2), 387-390.
- Devogler, K. L., & Ebersole, P. (1983). Young adolescents' meaning in life. *Psychological Reports, 52* (2), 427-431.
- Ebersole, P., & Devogler, K. L. (1981). Meaning in life: Category self-ratings. *The Journal of Psychology, 107* (2), 289-293.
- Ebersole, P., & Depaola, S. (1987). Meaning in life categories of later life couples. *The Journal of Psychology, 121*(2), 185-191.
- Fegg, M. J., Kramer, M., L'hoste, S., & Borasio, G. D. (2008). The Schedule for Meaning in Life Evaluation (SMiLE): Validation of a new instrument for meaning-in-life research. *Journal of Pain and Symptom Management, 35*(4), 356-364.
- Lambert, N. M., Stillman, T. F., Baumeister, R. F., Fincham, F. D., Hicks, J. A., & Graham, S. M. (2010). Family as a salient source of meaning in young adulthood. *The Journal of Positive Psychology, 5*(5), 367-376.
- O'Connor, K., & Chamberlain, K. (1996). Dimensions of life meaning: A qualitative investigation at mid-life. *British Journal of Psychology, 87* (3), 461-477.
- Reker, G. T. (1996). Sources of Meaning Profile- Revised.
- Reker, G. T., & Guppy, B. (1988). Sources of personal meaning among young, middle-aged, and older adults. In *Annual Meeting of the Canadian Association on Gerontology*. Halifax, Nova Scotia.
- Schnell, T. (2009). The Sources of Meaning and Meaning in Life Questionnaire (SoMe): Relations to demographics and well-being. *The Journal of Positive Psychology, 4* (6), 483-499.

Steger, M. F., Shim, Y., Rush, B. R., Brueske, L. A., Shin, J. Y., & Merriman, L. A. (2013). The mind's eye: A photographic method for understanding meaning in people's lives. *The Journal of Positive Psychology, 8* (6), 530-542.  
 Unknown study, 2016: The study was conducted by students.

**Table A2.** Sources of meaning: Generated a total of 106 sources of meaning from the literature, including the 12 items from our study.

---

1. Accidents - Illnesses<sup>a</sup>
2. Achievement<sup>a</sup>
3. Animals<sup>a</sup> / Pets<sup>c</sup>
4. Appearance<sup>a</sup>
5. Appreciation<sup>c</sup>
6. Awe<sup>a</sup>
7. Birth<sup>a</sup>
8. Care<sup>a</sup>
9. Challenge<sup>b</sup>
10. Community<sup>a</sup>
11. Connection<sup>b</sup>
12. Creativity<sup>b</sup>
13. Death<sup>a</sup>
14. Education<sup>a</sup> / Knowledge<sup>c</sup> / School<sup>c</sup> / Studying<sup>c</sup>
15. Fair treatment<sup>b</sup> / Justice<sup>b</sup> / Fairness<sup>b</sup>
16. Faith<sup>b</sup> / Religion<sup>b</sup> / Belief<sup>b</sup> / Going to Church<sup>b</sup>
17. Family<sup>a</sup> / Bringing up children<sup>c</sup>
18. Flow<sup>a</sup>
19. Freedom<sup>b</sup> / Autonomy<sup>b</sup>
20. Friends<sup>a</sup>
21. Generativity<sup>b</sup>
22. Gratitude<sup>b</sup>
23. Hedonistic activities<sup>a</sup> / Leisure<sup>b</sup> / Fun<sup>b</sup> / Indulgence<sup>b</sup>
24. Helping others<sup>a</sup> / Service<sup>b</sup> / Altruism<sup>b</sup> / Generosity<sup>c</sup> / Humanistic concerns<sup>b</sup> / Food to homeless<sup>b</sup>
25. Hobbies<sup>a</sup> / Activities<sup>c</sup> / Swimming<sup>c</sup>
26. Home<sup>a</sup>
27. Inspiration<sup>b</sup>
28. Legacy<sup>b</sup>
29. Life changing<sup>b</sup>
30. Life satisfaction<sup>b</sup>
31. Love<sup>b</sup>
32. Marriage<sup>a</sup>
33. Mindfulness<sup>a</sup>
34. Money<sup>a</sup> / Finances<sup>b</sup>
35. Nature<sup>a</sup> / Gardening<sup>c</sup>
36. Necessities<sup>a</sup> / Comfort<sup>c</sup>
37. Novelty<sup>b</sup>
38. Partner<sup>a</sup>
39. Peace<sup>a</sup> / Safety<sup>b</sup> / Harmony<sup>b</sup>
40. Personal goals<sup>b</sup> / Purpose<sup>a</sup> / Independent Pursuits<sup>b</sup> / Future aspirations<sup>b</sup>
41. Personal growth<sup>b</sup> / Reaching personal potential<sup>b</sup> / Self<sup>b</sup>
42. Physical Environment<sup>a</sup>
43. Pleasure<sup>a</sup> / Happiness<sup>b</sup> / Feel good<sup>b</sup>
44. Possessions<sup>a</sup> / Major Purchases<sup>c</sup> / Obtaining<sup>c</sup>
45. Power<sup>b</sup>
46. Quality time<sup>a</sup>
47. Reflection<sup>a</sup>
48. Relationships<sup>a</sup> / Restoring a relationship<sup>c</sup>
49. Responsibility<sup>b</sup>
50. Savoring<sup>a</sup>
51. Self-awareness<sup>b</sup> / Self-acceptance<sup>b</sup>
52. Self-care<sup>b</sup>
53. Self-worth<sup>b</sup>
54. Separation<sup>a</sup> / Divorce<sup>c</sup>
55. Societal-political<sup>a</sup>
56. Spirituality<sup>a</sup> / Self-transcendence<sup>b</sup>
57. Support<sup>b</sup> / Helping members of the family (child, parent)<sup>c</sup>
58. Synchronicity<sup>a</sup>
59. Technology<sup>a</sup>
60. Tradition<sup>b</sup>
61. Validation<sup>b</sup>
62. Well-being<sup>a</sup> / Health<sup>b</sup>
63. Work<sup>a</sup> / Occupation<sup>c</sup> / Career<sup>c</sup>

---

Note: <sup>a</sup> = semantically unique item, <sup>b</sup> = items similar to single values, <sup>c</sup> = items not semantically unique.

**Table A3.** Step 3: Definitions of the semantically unique sources of meaning (35).

---

1. **Accidents – Illnesses:** experiencing an unexpected and undesirable event that resulted in poor health, harm, injury, damage or loss.
2. **Animals:** caring for an animal that you keep as a companion or come to contact with.
3. **Appearance:** being concerned with the outward impression of yourself or others.
4. **Awe:** feeling amazed or being overwhelmed with wonder.
5. **Birth:** experiencing the birth of a child in your family or otherwise.
6. **Care:** giving your full attention to someone or something else than yourself.
7. **Community:** being involved in a group that shares common characteristics or interests.
8. **Death:** losing someone important or someone you were close to.
9. **Education:** becoming familiar with facts, truths or principles through study or investigation.
10. **Family:** people you are related to or feel close to, like parents or children whether you live together or not.

11. **Flow:** losing sense of time while doing something smoothly and effortlessly.
  12. **Friends:** people you are emotionally attached to or are associated with.
  13. **Hedonistic activities:** things that you find intensely pleasurable
  14. **Helping others:** being kind and generous to others, having selfless concerns for others.
  15. **Hobbies:** activities you do in your free time
  16. **Home:** the place in which you live or your affections are centred.
  17. **Marriage:** being legally bound to your partner and having a family with them.
  18. **Mindfulness:** focusing your full attention in the present moment experiencing thoughts, feelings and sensations without judging
  19. **Money:** experiencing financial comfort or lack of.
  20. **Nature:** enjoying the elements of the natural world or feeling connected to them.
  21. **Necessities:** having everything that is needed for your survival and basic needs.
  22. **Partner:** someone you share a romantic relationship with or have a common purpose.
  23. **Personal goals:** dreaming about the future and making plans.
  24. **Physical Environment:** a location that you occupy, visit or use for a specific purpose.
  25. **Possessions:** acquiring material objects, making major purchases.
  26. **Quality time:** spending time with others or self, giving your undivided attention.
  27. **Reflection:** being able to reflect on your experiences while knowing your character, feelings, motives and desires.
  28. **Relationships:** experiences involving people you feel connected to and have a special bond with.
  29. **Savoring:** experiencing things with all your full attention
  30. **Separation:** the ending or interruption of a relationship.
  31. **Societal-political:** things that relate to the wider society to the government or public affairs.
  32. **Synchronicity:** experiencing a coincidence of events.
  33. **Technology:** using a computer, phone etc. as tools of everyday life
  34. **Well-being:** experiencing a good state of being with soundness of body and mind.
  35. **Work:** exercising your skills and knowledge as a means of earning a living.
- 

**Table A4.** The 10 basic value domains (Schwartz, 1992; 2012) and the 57 individual values contained in each domain.

1. **Self-Direction:** Creativity / curious / freedom / choosing own goals / independent / private life
  2. **Stimulation :** Daring / a varied life / an exciting life
  3. **Hedonism:** Pleasure / enjoying life / self-indulgent
  4. **Achievement:** Successful / capable / ambitious / influential / intelligent / self-respect
  5. **Power:** Social power / authority / wealth / preserving my public image / social recognition
  6. **Security:** Clean / national security / social order / family security / reciprocation of favors / healthy / sense of belonging
  7. **Conformity:** Politeness / honoring parents and elders / obedient / self-discipline
  8. **Tradition:** Devout / accepting portion in life / humble / moderate / respect for tradition
  9. **Benevolence:** Helpful / honest / forgiving / loyal / responsible / true friendship / a spiritual life / mature love / meaning in life
  10. **Universalism:** Protecting the environment / a world of beauty / unity with nature/ broad-minded / social justice / wisdom / equality / a world at peace / inner harmony
- 

**Table A5.** Descriptions of the 10 basic values based on the single values they represent.

- Self-Direction:** Experiences that enhanced your independent thought and action and contained elements such as: creativity, freedom (autonomy), purpose, personal growth, responsibility, self-acceptance, self-awareness, self-care, self-worth and validation.
- Stimulation:** Experiences that gave you a sense of excitement and contained elements such as: novelty, challenge, inspiration, life changing and self-transcendence.
- Hedonism:** Experiences that gave you a sense of sensuous gratification and contained elements such as: happiness, fun, leisure, pleasure, feel good, indulgence and life satisfaction.
- Achievement:** Experiences that gave you a sense of personal success and contained elements of: reaching personal potential and legacy.
- Power:** Experiences that enhanced your social status and prestige and gave you a sense of power, control and dominance over people or resources.
- Security:** Experiences that enhanced (or threatened) your sense of safety and stability and contained elements such as: connection, comfort, intimacy, harmony, understanding, self, well-being.
- Conformity:** Experiences that restrain your actions, inclinations, and impulses like: obedient, self-discipline, politeness, honoring parents and elders.
- Tradition:** Experiences that enhance your sense of respect, commitment, and acceptance of the customs and ideas of your culture and contain elements such as religion and belief.
- Benevolence:** Experiences that preserve and enhance the welfare of those you are in touch with and contain the elements of: altruism, appreciation, generosity, gratitude, love, service and support.
- Universalism:** Experiences that enhance your understanding, appreciation, tolerance, and protection of the welfare of others and of nature and contain the elements such as: justice, fairness, humanistic concern, peace and spirituality.
-
