# Supplementary material for: A relationship that makes life worth-living: levels of value orientation explain differences in meaning and life satisfaction
Source: PubMed Central journal article supplement (PMC8802095; doi:10.1016/j.heliyon.2022.e08802), 2022-01-24
Supplement: mmc2.pdf [file mmc2.pdf]

## APPENDIX B

**Table 1.**

*Kruskal-Wallis tests tested differences between meaning and life satisfaction measures across depth of meaning or the four motivational orientations that underlie the 10 value domains.*

| <i>MOV</i>          | Mean / Standard Deviation |               |                 |                |                  |               |
|---------------------|---------------------------|---------------|-----------------|----------------|------------------|---------------|
|                     | MLQ                       |               |                 | MEMS           |                  | SWLS          |
|                     | <i>Presence</i>           | <i>Search</i> | <i>Compreh.</i> | <i>Purpose</i> | <i>Mattering</i> |               |
| Conservation        | 5.11 / 1.38               | 4.43 / 1.58   | 5.14 / 1.31     | 5.47 / 1.01    | 4.65 / 1.37      | 4.75 / 1.52   |
| Self-enhancement    | 5.12 / 1.38               | 4.43 / 1.58   | 5.14 / 1.30     | 5.47 / 1.01    | 4.65 / 1.37      | 4.75 / 1.52   |
| Openness to change  | 5.12 / 1.38               | 4.43 / 1.58   | 5.14 / 1.30     | 5.47 / 1.01    | 4.65 / 1.37      | 4.75 / 1.52   |
| Self-transcendence  | 5.12 / 1.38               | 4.43 / 1.58   | 5.14 / 1.30     | 5.47 / 1.01    | 4.65 / 1.37      | 4.75 / 1.52   |
| $H(df) = \chi^2, p$ | H(3) = .00, 1             | H(3) = .00, 1 | H(3) = .00, 1   | H(3) = .00, 1  | H(3) = .00, 1    | H(3) = .00, 1 |

*Note:*  $N = 276$ ; MOV = Motivational orientation of values; MLQ = Meaning in Life

Questionnaire; MEMS = Multidimensional Existential Meaning Scale; SWLS = Satisfaction With Life Scale; H = test statistic for Kruskal-Wallis test;  $df$  = degrees of freedom;  $\chi^2$  = Kruskal-Wallis chi-squared.
